# Supplementary material for: Nanoporous Carbon Electrodes Derived from Coffee Side Streams for Supercapacitors in Aqueous Electrolytes
Source: MDPI journal article supplement (doi:10.3390/nano12152647), 2022-08-01
Supplement: s1 [file s1]

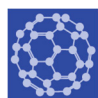

# Nanoporous Carbon Electrodes Derived from Coffee Side Streams for Supercapacitors in Aqueous Electrolytes

Julian Selinger <sup>1,2</sup>, Sebastian Stock <sup>3</sup>, Werner Schlemmer <sup>1</sup>, Mathias Hobisch <sup>1</sup>, Nikolaos Kostoglou <sup>4</sup>, Qamar Abbas <sup>5,6</sup>, Oskar Paris <sup>3</sup>, Christian Mitterer <sup>4</sup>, Michael Hummel <sup>2</sup> and Stefan Spirk <sup>1,\*</sup>

<sup>1</sup> Institute of Bioproducts and Paper Technology, Graz University of Technology, Inffeldgasse 23, 8010 Graz, Austria; julian.selinger@tugraz.at (J.S.); werner.schlemmer@ecolyte.at (W.S.); mathias.hobisch@yahoo.com (M.H.)

<sup>2</sup> Department of Bioproducts and Biosystems, Aalto University, P.O. Box 16300, 00076 Aalto, Finland; michael.hummel@aalto.fi

<sup>3</sup> Institute of Physics, Montanuniversität Leoben, Franz-Josef-Straße 18, 8700 Leoben, Austria; sebastian.stock@unileoben.ac.at (S.S.); oskar.paris@unileoben.ac.at (O.P.)

<sup>4</sup> Department of Materials Science, Montanuniversität Leoben, Franz-Josef-Straße 18, 8700 Leoben, Austria; nikolaos.kostoglou@unileoben.ac.at (N.K.); christian.mitterer@unileoben.ac.at (C.M.)

<sup>5</sup> Institute for Chemistry and Technology of Materials, Graz University of Technology, Stremayrgasse 9, 8010 Graz, Austria; qamar.abbas@tugraz.at

<sup>6</sup> Institute of Chemistry and Technical Chemistry, Faculty of Chemical Technology, Poznan University of Technology, Berdychowo 4, 60965 Poznan, Poland

\* Correspondence: stefan.spirk@tugraz.at

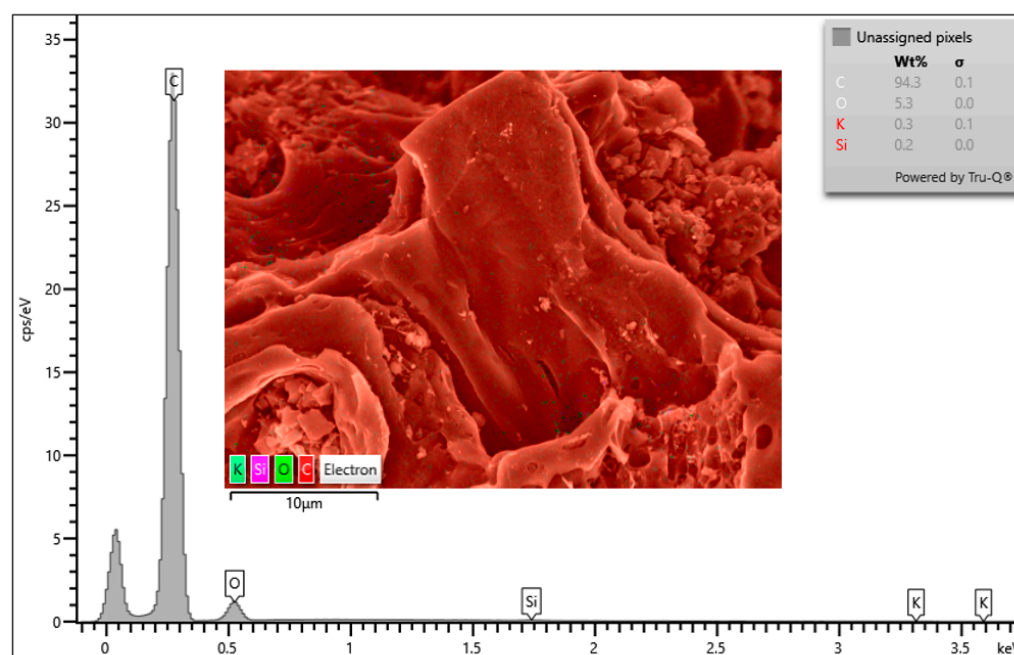

**Figure S1.** EDX spectrum of AC—CSS, with an elemental map and the respective share of elements detected.

**Table S1.** Weight of the individual electrodes used for the respective measurements.

|           | CV and GCD       |                 |               |                 | Long Term cycling |                 |               |                 |
|-----------|------------------|-----------------|---------------|-----------------|-------------------|-----------------|---------------|-----------------|
|           | Electrode weight |                 | Respective AC |                 | Electrode weight  |                 | Respective AC |                 |
|           | Anode<br>[mg]    | Cathode<br>[mg] | Anode<br>[mg] | Cathode<br>[mg] | Anode<br>[mg]     | Cathode<br>[mg] | Anode<br>[mg] | Cathode<br>[mg] |
| YP—80F    | 4.18             | 4.27            | 3.76          | 3.84            | 4.26              | 4.26            | 3.83          | 3.83            |
| AC—CSS    | 3.11             | 3.12            | 2.80          | 2.81            | 3.26              | 3.25            | 2.93          | 2.93            |
| 3 mM CA   | 3.24             | 3.25            | 2.92          | 2.93            | 3.2               | 3.18            | 2.88          | 2.86            |
| 3 mM pBQ  | 3.34             | 3.32            | 3.01          | 2.99            | 3.04              | 3.03            | 2.74          | 2.73            |
| 3 mM MHQ  | 3.40             | 3.35            | 3.06          | 3.02            | 3.07              | 3.06            | 2.76          | 2.75            |
| 0.1 M pBQ | 2.99             | 2.96            | 2.69          | 2.66            | 2.80              | 2.80            | 2.52          | 2.52            |
| 2.3 M MHQ | 3.03             | 3.1             | 2.73          | 2.79            | 2.82              | 2.73            | 2.54          | 2.46            |

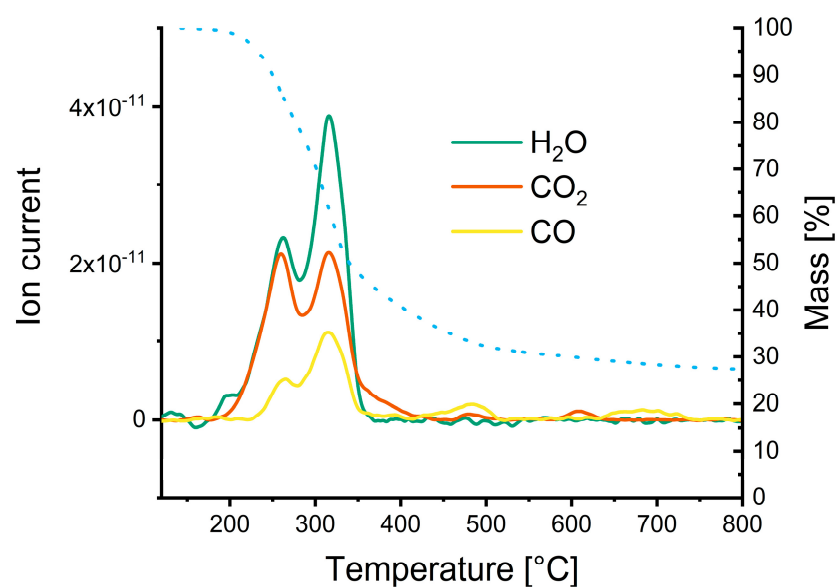**Figure S2.** Evaluation of the most common gases during biomass pyrolysis under inert conditions.

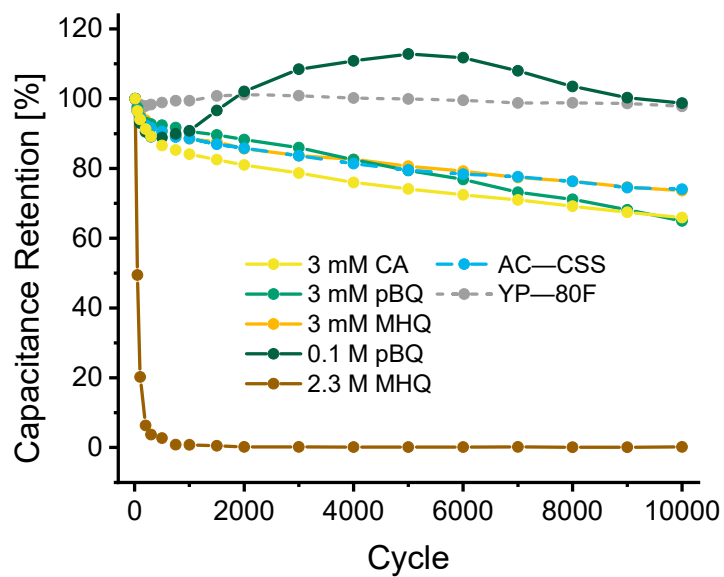

Figure S3. Capacitance retention over 10000 cycles.

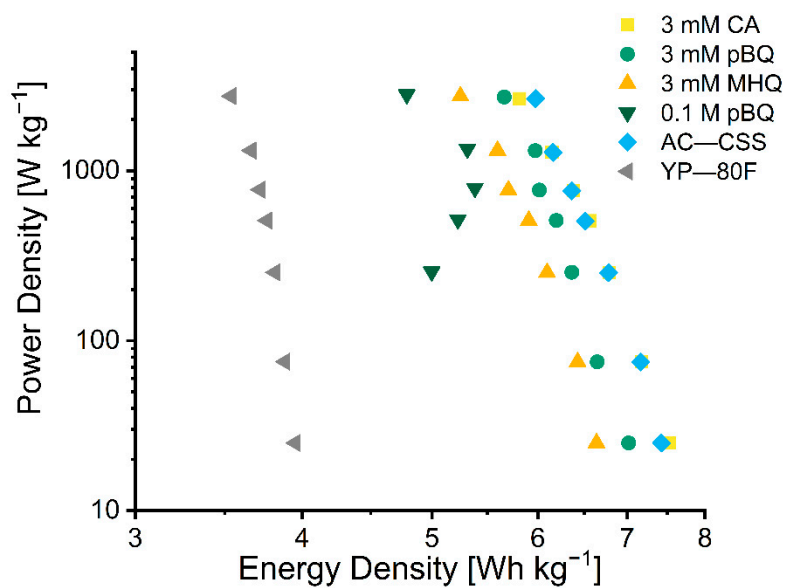

Figure S4. Ragone plot based on GCD-data. Due to the strong cycle dependence of 2.3 M MHQ, this measurement was not included.

**Table S2.** Capacitances at different current densities.

| Current Density      | YP80F                | AC—CSS               | 3mM CA               | 3mM pBQ              | 3mM MHQ              | 0.1 M pBQ            | 2.3 M MHQ *          |
|----------------------|----------------------|----------------------|----------------------|----------------------|----------------------|----------------------|----------------------|
| [A g <sup>-1</sup> ] | [F g <sup>-1</sup> ] |
| 0.1                  | 113.8                | 213.8                | 216.5                | 202.0                | 191.1                | -- **                | -- **                |
| 0.3                  | 111.7                | 206.2                | 206.5                | 191.4                | 185.0                | -- **                | 433.2                |
| 1.0                  | 109.9                | 195.1                | 195.4                | 183.3                | 175.6                | 144.0                | 151.6                |
| 2.0                  | 108.4                | 187.6                | 188.9                | 178.4                | 170.1                | 150.6                | < 1                  |
| 3.0                  | 107.1                | 183.2                | 183.7                | 173.3                | 164.2                | 155.1                | < 1                  |
| 5.0                  | 105.5                | 177.4                | 177.1                | 172.1                | 161.2                | 153.1                | < 1                  |
| 10.0                 | 101.9                | 172.1                | 167.4                | 163.1                | 151.2                | 137.9                | < 1                  |

\* 2.3M MHQ shows a strong cycle dependence thus values should be taken with caution

\*\* charging times were exceeding one hour

**Table S3.** Capacitances at different scan rates.

| Scan Rate             | YP—80F               | AC—CSS               | 3mM CA               | 3mM pBQ              | 3mM MHQ              | 0.1 M pBQ            | 2.3M MHQ *           |
|-----------------------|----------------------|----------------------|----------------------|----------------------|----------------------|----------------------|----------------------|
| [mV s <sup>-1</sup> ] | [F g <sup>-1</sup> ] |
| 2                     | 125.3                | 243.8                | 242.4                | 250.7                | 228.1                | 261.7                | 456.7                |
| 5                     | 121.3                | 232.4                | 230.9                | 237.2                | 216.4                | 280.5                | 306.8                |
| 10                    | 118.5                | 223.4                | 221.6                | 227.5                | 207.0                | 268.1                | 207.5                |
| 20                    | 115.8                | 214.0                | 211.7                | 218.0                | 196.3                | 245.6                | 130.9                |
| 50                    | 112.2                | 198.3                | 196.0                | 200.3                | 180.5                | 237.9                | 22.5                 |
| 100                   | 107.6                | 185.6                | 181.7                | 184.1                | 164.8                | 205.7                | 11.4                 |

\* 2.3M MHQ shows a strong cycle dependence thus values should be taken with caution
